# Supplementary material for: Structural color printing with a dielectric layer coated on a nanotextured metal substrate: simulation and experiment
Source: Royal Society of Chemistry journal article supplement (doi:10.1039/c9na00321e), 2019-01-01
Supplement: c9na00321e1.pdf [file c9na00321e1.pdf]

## Supplementary Information

### Structural color printing with dielectric layer coated on nanotextured metal substrate: simulation and experiment

Minseok Seo,<sup>a</sup> Heungyeol Lee,<sup>b</sup> Hohyeong Kim,<sup>b</sup> and Myeongkyu Lee\*<sup>a</sup>

<sup>a</sup>Department of Materials Science and Engineering, Yonsei University, Seoul 120-749, Korea

<sup>b</sup>Korea Institute of Industrial Technology, Incheon 21999, Korea

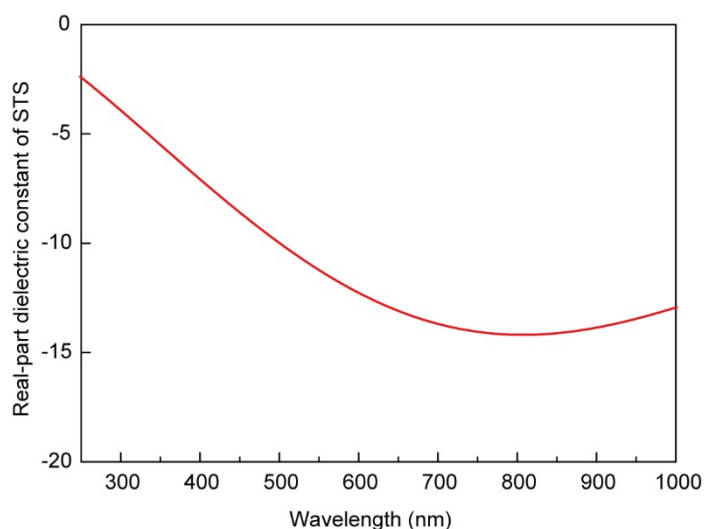

**Figure S1.** Real-part dielectric constant of STS

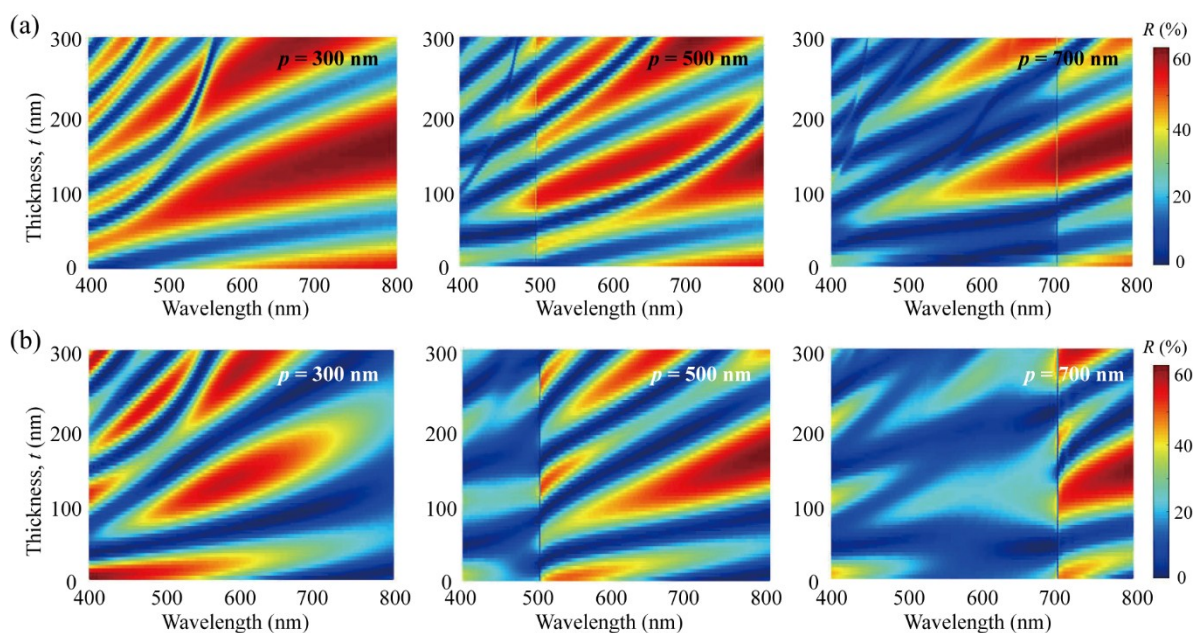

**Figure S2.** (a) Reflectance ( $R$ ) of TE-polarized light with respect to the thickness of the dielectric layer and the wavelength of the light at three different grating periods:  $p = 300, 500,$  and  $700$  nm. (b) Reflectance of TM-polarized light. The refractive index of the dielectric layer is  $n = 2.0$ .

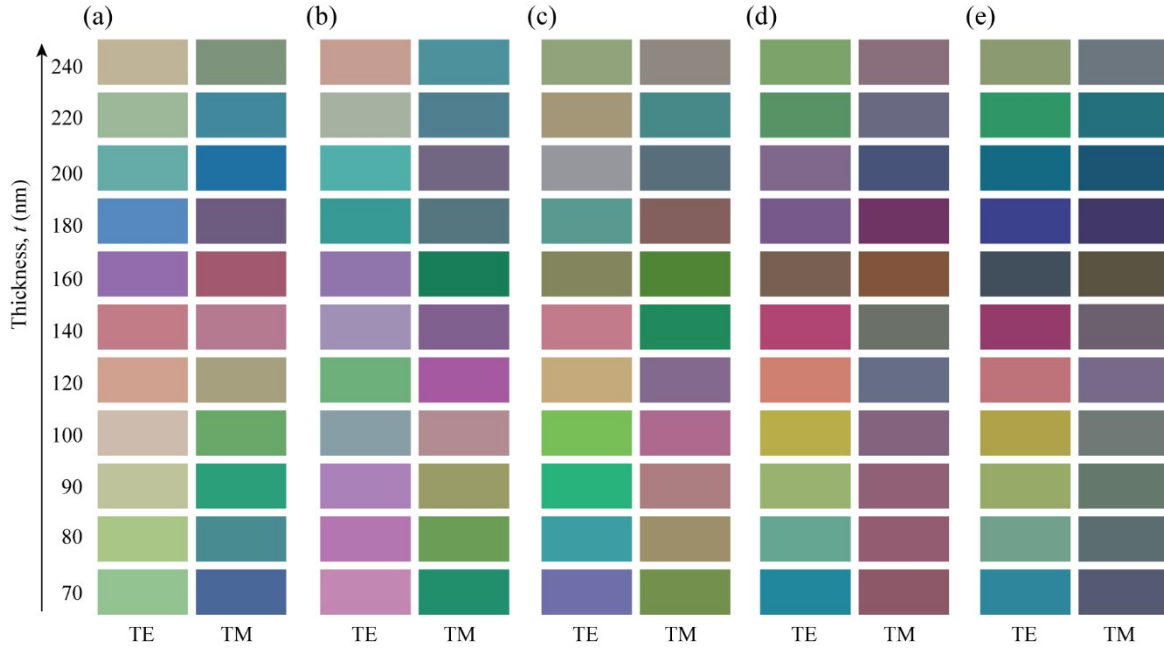

**Figure S3.** Colors with respect to the thickness of the dielectric layer for (a)  $p = 300$  nm, (b)  $p = 400$  nm, (c)  $p = 500$  nm, (d)  $p = 600$  nm, and (e)  $p = 700$  nm. The refractive index of the dielectric layer is  $n = 2.0$ .

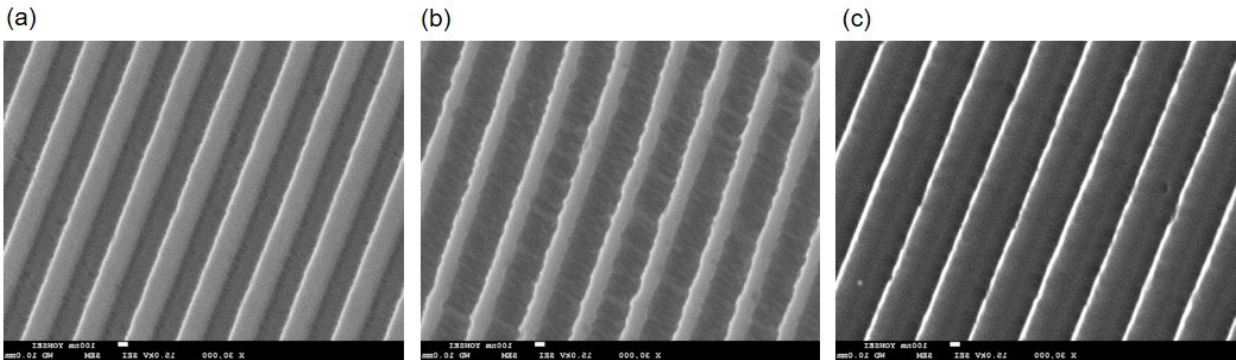

**Figure S4.** SEM images of line patterns formed on the surface of STS. The duty cycle and grating height are (a) 0.5 and  $\sim 60$  nm, (b) 0.36 and  $\sim 150$  nm, and (c) 0.12 and  $\sim 175$  nm. All have the same period of 500 nm.

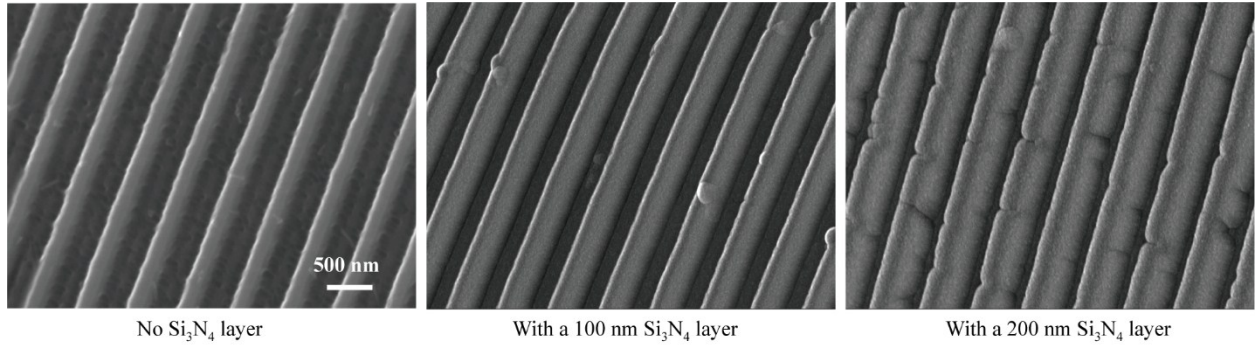

**Figure S5.** SEM images of the textured STS surface before and after the deposition of the  $\text{Si}_3\text{N}_4$  layer.

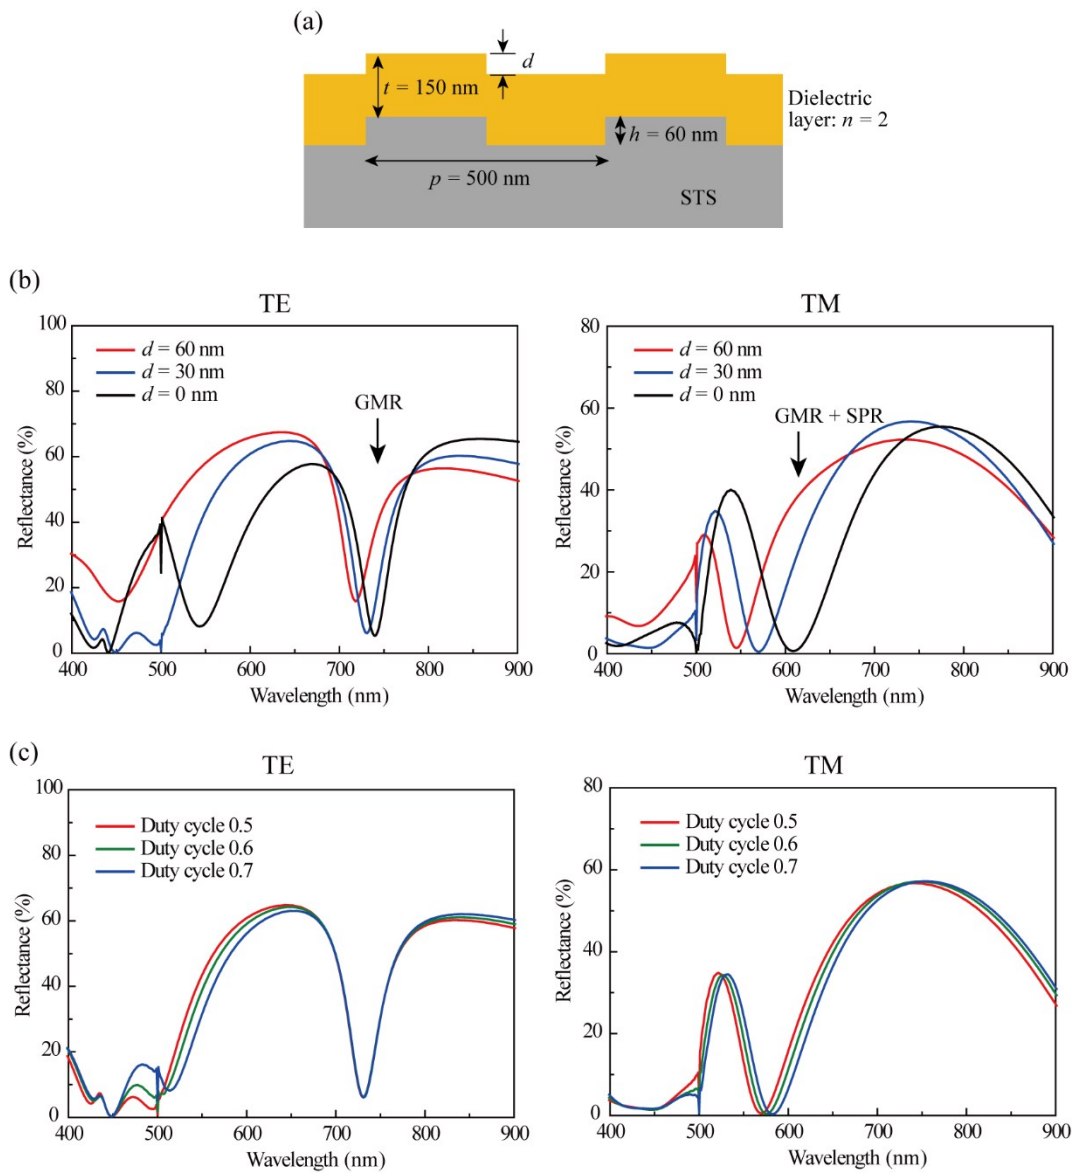

**Figure S6.** (a) Simulation structure for investigating the effect of the surface morphology of the dielectric layer. (b) Reflection spectra versus the groove depth “ $d$ ”, where the duty cycle of the surface texture is 0.5. (c) Reflection spectra versus the duty cycle at  $d = 30$  nm.

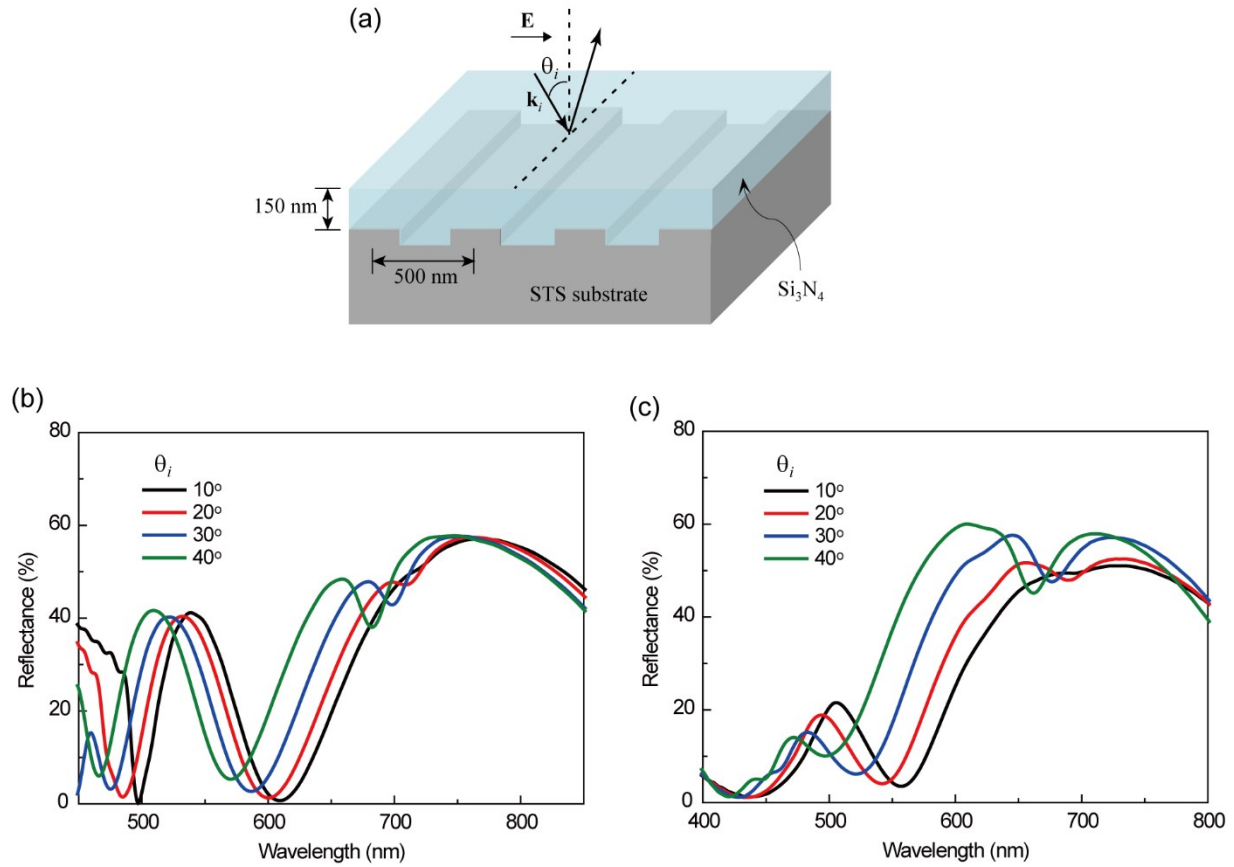

**Figure S7.** Angle-dependence of the reflectance spectra: (a) structure used for the simulation, (b) simulation spectra, and (c) experimental spectra.

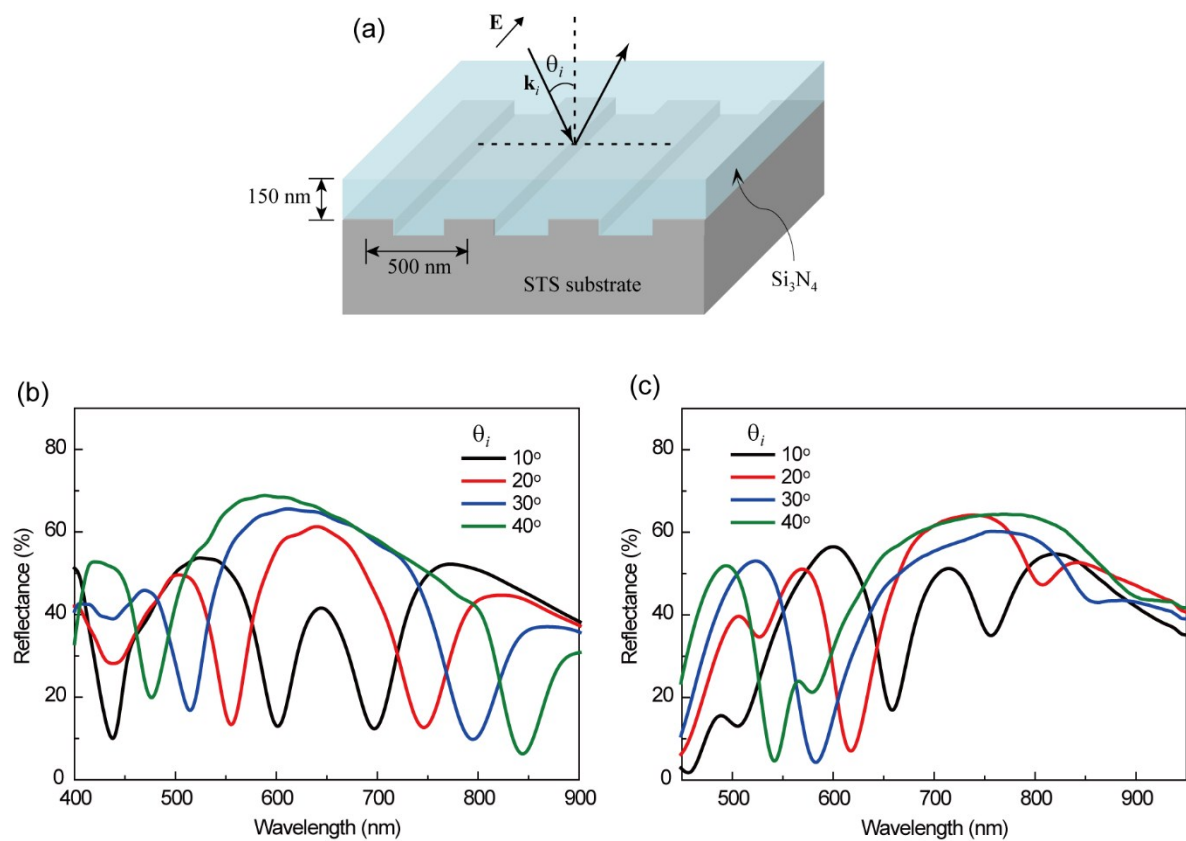

**Figure S8.** Angle-dependence of the reflectance spectra: (a) structure used for the simulation, (b) simulation spectra, and (c) experimental spectra.
